# Supplementary material for: Gravity Prediction Method and the Application of Full-Space Tunnels in the Deep Extension of High-Density Vertical Orebodies
Source: Frontiers journal article supplement (doi:10.3389/feart.2022.897909), 2022-05-17
Supplement: Table_3.DOCX [file Table_3.DOCX]

**Table 1**

Relationship between the value and deep extension of the vertical high-density cuboid orebody

| Number |  | Deep extension of the orebody |
| --- | --- | --- |
| 1 | ＞0 | Deep extension length of the orebody is more than the upper control length |
| 2 | = 0 | Deep extension length of the orebody is equal to the upper control length |
| 3 | ＜0 | Deep extension length of the orebody is less than the upper control length |

**Table 2**

Results of field separation and value of ideal gravity anomalies

| point number | Actual Bouguer Gravity Anomaly /10g.u. | Actual residual gravity anomaly /10g.u. | Ideal residual gravity anomaly /10g.u. |
| --- | --- | --- | --- |
| 1 | -2.269 | 1.962 | 1.906 |
| 2 | -1.462 | 2.058 | 2.117 |
| 3 | -0.909 | 2.341 | 2.356 |
| 4 | -0.297 | 2.443 | 2.627 |
| 5 | 2.875 | 2.925 | 2.937 |
| 6 | 2.316 | 3.426 | 3.288 |
| 7 | 0.547 | 3.647 | 3.688 |
| 8 | 0.482 | 4.162 | 4.143 |
| 9 | 0.907 | 4.647 | 4.657 |
| 10 | 1.686 | 5.316 | 5.234 |
| 11 | 2.675 | 5.825 | 5.875 |
| 12 | 4.039 | 6.626 | 6.574 |
| 13 | 3.536 | 7.276 | 7.313 |
| 14 | 4.314 | 8.044 | 8.059 |
| 15 | 5.352 | 8.832 | 8.758 |
| 16 | 7.45 | 9.42 | 9.34 |
| 17 | 6.09 | 9.73 | 9.728 |
| 18 | 7.61 | 9.92 | 9.865 |
| 19 | 6.817 | 9.567 | 9.728 |
| 20 | 5.99 | 9.41 | 9.34 |
| 21 | 5.201 | 8.711 | 8.758 |
| 22 | 4.921 | 8.051 | 8.059 |
| 23 | 3.808 | 7.248 | 7.313 |
| 24 | 4.221 | 6.621 | 6.574 |
| 25 | 3.153 | 5.753 | 5.875 |
| 26 | 2.612 | 5.302 | 5.234 |
| 27 | 1.415 | 4.625 | 4.657 |
| 28 | 0.802 | 4.322 | 4.143 |
| 29 | 1.521 | 3.631 | 3.688 |
| 30 | -0.356 | 3.274 | 3.288 |
| 31 | -0.217 | 2.893 | 2.937 |
| 32 | -0.9 | 2.61 | 2.627 |
| 33 | -0.606 | 2.414 | 2.356 |
| 34 | -0.774 | 2.126 | 2.117 |
| 35 | 0.362 | 1.892 | 1.906 |
